# Supplementary figures and images for: Comparison of near-infrared diffuse reflectance (NIR) and attenuated-total-reflectance mid-infrared (ATR-IR) spectroscopic determination of the antioxidant capacity of Sambuci flos with classic wet chemical methods (assays)
Source: Royal Society of Chemistry journal article supplement (doi:10.1039/c5ay01314c), 2015-08-26

1 Supplementary part: Regression coefficients plots calculated with ATR-IR spectra

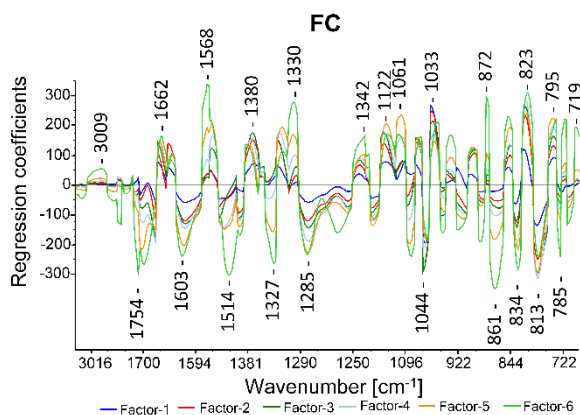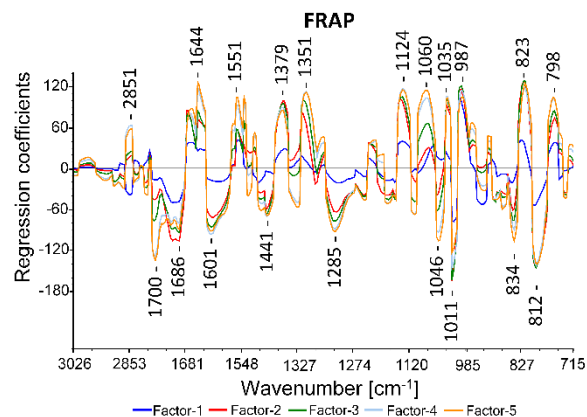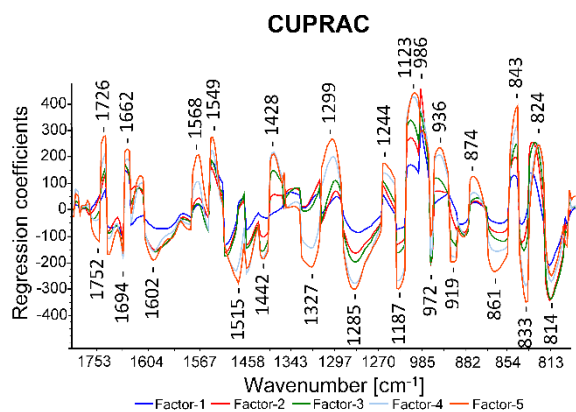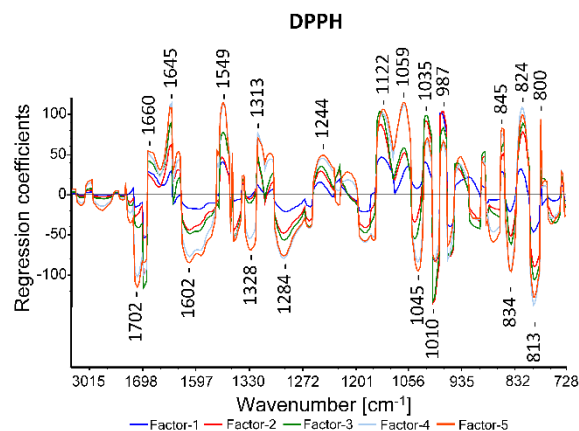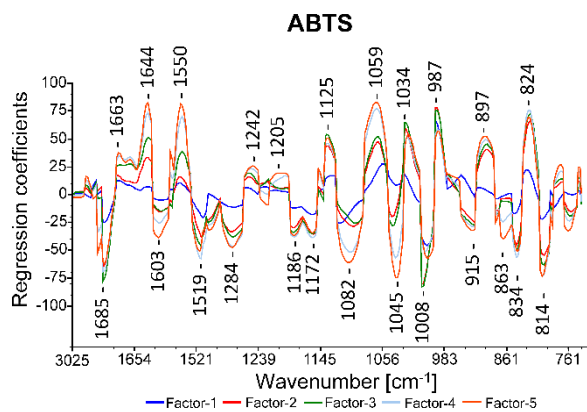

Supplement: c5ay01314c1.pdf [file c5ay01314c1.pdf]
